# Supplementary material for: Real-world effects of anti-vascular endothelial growth factor injection frequency on visual outcomes in patients with diabetic macular oedema
Source: PubMed Central journal article supplement (PMC11156885; doi:10.1038/s41433-024-02998-2), 2024-03-06
Supplement: 41433_2024_2998_MOESM1_ESM.pdf [file 41433_2024_2998_MOESM1_ESM.pdf]

**Table S1.** Patient factors as predictors of injection interval at 12 months and 24 months

| Variable         | 12 Months   |         | 24 Months   |             |
|------------------|-------------|---------|-------------|-------------|
|                  | Effect Size | p-value | Effect Size | p-value     |
| Age              | -0.40       | 0.06    | 0.51        | 0.21        |
| Sex              | 0.82        | 0.83    | -1.8        | 0.79        |
| Race             | 5.9         | 0.17    | 8.1         | 0.32        |
| Affected Eye     | 2.0         | 0.61    | -6.5        | 0.34        |
| A1C              | 1.1         | 0.27    | -1.7        | 0.29        |
| Serum creatinine | 3.0         | 0.07    | -1.7        | 0.69        |
| Inpatient visits | -2.3        | 0.09    | 8.3         | <b>0.03</b> |
| Cancelled visits | -0.63       | 0.44    | -0.30       | 0.85        |
| Baseline BVA     | -0.091      | 0.54    | 0.12        | 0.73        |
| Baseline CST     | 0.023       | 0.18    | -0.032      | 0.58        |
