# Supplementary material for: Real-world effects of anti-vascular endothelial growth factor injection frequency on visual outcomes in patients with diabetic macular oedema
Source: PubMed Central journal article supplement (PMC11156885; doi:10.1038/s41433-024-02998-2), 2024-03-06
Supplement: 41433_2024_2998_MOESM2_ESM.pdf [file 41433_2024_2998_MOESM2_ESM.pdf]

**Table S2.** Patient outcomes at baseline, 12-months, and 24-months by 12-month injection interval subgroups using only patients with 24 months of follow-up data.

| Factor                                       | N   | ≤ q8w           | N  | q8-12w          | N  | >q12            | P-value <sup>1</sup> |
|----------------------------------------------|-----|-----------------|----|-----------------|----|-----------------|----------------------|
| <b>BVA (ETDRS), Mean ± SD</b>                |     |                 |    |                 |    |                 |                      |
| Baseline                                     | 101 | 65.1±11.5       | 54 | 60.5±16.5       | 38 | 69.3±9.32       | <b>0.020</b>         |
| . 12 Month                                   | 101 | 68.8±12.1       | 54 | 68.9±10.4       | 38 | 70.9±8.4        | 0.83                 |
| Change from baseline                         | 101 | 3.3±11.4        | 54 | 8.4±13.0        | 38 | 1.5±9.5         | <b>0.037</b>         |
| p-value <sup>2</sup> (Baseline vs. 12 month) |     | <b>0.004</b>    |    | <b>1.74e-05</b> |    | 0.32            |                      |
| . 24 Month                                   | 101 | 70.9±10.0       | 54 | 69.8±10.0       | 38 | 71.4±8.8        | 0.70                 |
| Change from baseline                         | 101 | 5.4±11.7        | 54 | 9.3±15.4        | 38 | 2.0±12.3        | 0.10                 |
| p-value <sup>2</sup> (Baseline vs. 24 month) |     | <b>1.46e-05</b> |    | <b>4.69e-05</b> |    | 0.32            |                      |
| <b>CST (µm), Mean ± SD</b>                   |     |                 |    |                 |    |                 |                      |
| Baseline                                     | 101 | 414±98.5        | 54 | 446±122         | 38 | 436±118         | 0.30                 |
| . 12 Month                                   | 101 | 341±90.3        | 54 | 347±81.4        | 38 | 361±101         | 0.68                 |
| Change from baseline                         | 101 | -73.1±110       | 54 | -98.8±128       | 38 | -72.8±141       | 0.51                 |
| p-value <sup>2</sup> (Baseline vs. 12 month) |     | <b>1.76e-09</b> |    | <b>5.88e-07</b> |    | <b>3.28e-03</b> |                      |
| . 24 Month                                   | 101 | 322±94.5        | 54 | 324±82.1        | 38 | 353±91.4        | 0.11                 |
| Change from baseline                         | 101 | -91.3±117       | 54 | -122±142        | 38 | -85.1±163       | 0.43                 |
| p-value <sup>2</sup> (Baseline vs. 24 month) |     | <b>1.13e-11</b> |    | <b>5.88e-08</b> |    | <b>0.0031</b>   |                      |
