# Supplementary material for: Real-world effects of anti-vascular endothelial growth factor injection frequency on visual outcomes in patients with diabetic macular oedema
Source: PubMed Central journal article supplement (PMC11156885; doi:10.1038/s41433-024-02998-2), 2024-03-06
Supplement: 41433_2024_2998_MOESM3_ESM.pdf [file 41433_2024_2998_MOESM3_ESM.pdf]

**Table S3:** Distribution of Patient within each Quartile of CST Variability among Injection Interval Groups

| Quartile of 12-month CST Change      | Percent of Patients in each Injection Interval Group |        |       | Total Patients |
|--------------------------------------|------------------------------------------------------|--------|-------|----------------|
|                                      | <q8w                                                 | q8-12w | >q12w |                |
| First                                | 46%                                                  | 33%    | 21%   | 72             |
| Second                               | 56%                                                  | 25%    | 18%   | 71             |
| Third                                | 51%                                                  | 23%    | 27%   | 71             |
| Fourth                               | 43%                                                  | 29%    | 28%   | 72             |
| <b>Chi-Square Test P-value: 0.53</b> |                                                      |        |       |                |
