# Supplementary material for: Real-world effects of anti-vascular endothelial growth factor injection frequency on visual outcomes in patients with diabetic macular oedema
Source: PubMed Central journal article supplement (PMC11156885; doi:10.1038/s41433-024-02998-2), 2024-03-06
Supplement: 41433_2024_2998_MOESM4_ESM.pdf [file 41433_2024_2998_MOESM4_ESM.pdf]

**Table S4.** Patient factors as predictors of change in BVA and CST

| Variable         | 12 Months          |                |                    |               | 24 months          |         |                    |              |
|------------------|--------------------|----------------|--------------------|---------------|--------------------|---------|--------------------|--------------|
|                  | BVA<br>Effect size | p-value        | CST<br>Effect size | p-value       | BVA<br>Effect size | p-value | CST<br>Effect size | p-value      |
| Age              | 0.0035             | 0.85           | 0.13               | 0.83          | -0.020             | 0.48    | 0.081              | 0.94         |
| Sex              | 0.94               | <b>0.0049</b>  | 4.2                | 0.71          | 0.12               | 0.81    | 3.9                | 0.83         |
| Race             | -0.17              | 0.64           | -27                | <b>0.030</b>  | 0.35               | 0.54    | -48                | <b>0.030</b> |
| Affected Eye     | -0.44              | 0.17           | -4.8               | 0.67          | 0.25               | 0.60    | 23                 | 0.22         |
| A1C              | -0.19              | <b>0.030</b>   | 4.7                | 0.12          | -0.019             | 0.87    | 3.8                | 0.39         |
| Serum creatinine | 0.032              | 0.82           | -5.9               | 0.23          | 0.049              | 0.87    | -3.2               | 0.78         |
| Inpatient visits | -0.077             | 0.51           | 2.5                | 0.53          | 0.27               | 0.31    | 12                 | 0.24         |
| Cancelled visits | -0.014             | 0.84           | 3.3                | 0.17          | -0.052             | 0.64    | -6.2               | 0.15         |
| Baseline BVA     | 0.13               | <b>2.0e-16</b> | 1.1                | <b>0.010</b>  | 0.037              | 0.14    | 0.67               | 0.49         |
| Baseline CST     | 0.0022             | 0.14           | 0.25               | <b>2.1e-6</b> | 0.0028             | 0.24    | 0.075              | 0.42         |
