# Supplementary material for: Real-world effects of anti-vascular endothelial growth factor injection frequency on visual outcomes in patients with diabetic macular oedema
Source: PubMed Central journal article supplement (PMC11156885; doi:10.1038/s41433-024-02998-2), 2024-03-06
Supplement: 41433_2024_2998_MOESM5_ESM.pdf [file 41433_2024_2998_MOESM5_ESM.pdf]

**Table S5.** Multiple linear regression analyzing relation between interval groups and injection regimens and 12- and 24-month BVA and CST change.

| Factor                   | 12-month BVA Change |                  | 12-month CST Change |                  | 24-month BVA Change |                  | 24-month CST Change |                  |
|--------------------------|---------------------|------------------|---------------------|------------------|---------------------|------------------|---------------------|------------------|
|                          | Estimate            | P-value          | Estimate            | P-value          | Estimate            | P-value          | Estimate            | P-value          |
| Intercept                | 34.45               | <b>&lt;0.001</b> | 134.35              | <b>0.00</b>      | 56.34               | <b>&lt;0.001</b> | 206.91              | <b>0.00</b>      |
| >q12w Group              | 0.07                | 0.96             | 14.35               | 0.29             | -0.32               | 0.87             | 27.13               | 0.15             |
| q8-12w Group             | 2.21                | 0.13             | -2.57               | 0.83             | 0.58                | 0.72             | 1.79                | 0.91             |
| <q8w Group               | Reference Level     |                  |                     |                  |                     |                  |                     |                  |
| Baseline BVA             | 0.48                | <b>&lt;0.001</b> | 1.02                | <b>0.01</b>      | -0.72               | <b>&lt;0.001</b> | 0.84                | 0.11             |
| Baseline CST             | 0.00                | 0.56             | -0.68               | <b>&lt;0.001</b> | 0.00                | 0.54             | -0.90               | <b>&lt;0.001</b> |
| Bevacizumab Only Regimen | 0.60                | 0.85             | 11.00               | 0.69             | -2.48               | 0.50             | 13.85               | 0.70             |
| Mixed Regimen            | 2.43                | 0.46             | 14.95               | 0.60             | -1.47               | 0.70             | 27.61               | 0.45             |
| Ranibizumab Only Regimen | 13.40               | 0.21             | -61.93              | 0.50             | -18.35              | 0.07             | -100.54             | 0.31             |
| Aflibercept Only Regimen | Reference Level     |                  |                     |                  |                     |                  |                     |                  |
| Adjusted R-squared       | 0.27                | <b>&lt;0.001</b> | 0.45                | <b>&lt;0.001</b> | 0.51                | <b>&lt;0.001</b> | 0.55                | <b>&lt;0.001</b> |
